# Supplementary material for: Screening of deep eutectic solvents (DESs) as green CO2 sorbents: from solubility to viscosity
Source: Royal Society of Chemistry journal article supplement (doi:10.1039/c6nj03140d), 2016-11-29
Supplement: c6nj03140d1.pdf [file c6nj03140d1.pdf]

## Electronic Supplementary Information

### Screening of Deep Eutectic Solvents (DESs) as green CO<sub>2</sub> sorbents: from solubility to viscosity

Shokat Sarmad,<sup>\*a</sup> Yujiao Xie,<sup>a</sup> Jyri-Pekka Mikkola<sup>b,c</sup> and Xiaoyan Ji<sup>a</sup>

Corresponding E-mail: shokat.sarmad@ltu.se

- a. Department of Engineering Science and Mathematics, Division of Energy Science, Luleå University of Technology, 971 87 Luleå Sweden
- b. Technical Chemistry, Department of Chemistry, Chemical-Biological Centre, Umeå University, SE-90871, Umeå, Sweden
- c. Industrial Chemistry & Reaction Engineering, John Gadolin Process Chemistry Centre, Åbo Akademi University, Biskopsgatan 8, FI-20500, Åbo-Turku, Finland

**Table S1** CO<sub>2</sub> solubility in different DESs

| Salt                                | HBD                | Molar ratio salt:HBD | Temperature (K) | Pressure (MPa) | mol/kg | mol/mol | Ref |
|-------------------------------------|--------------------|----------------------|-----------------|----------------|--------|---------|-----|
| choline chloride                    | urea               | 1:1.5                | 313.15          | 11.84          | 2.7380 | 0.201   | 38  |
| choline chloride                    | urea               | 1:1.5                | 323.15          | 12.52          | 2.5696 | 0.191   | 38  |
| choline chloride                    | urea               | 1:1.5                | 333.15          | 12.50          | 2.2609 | 0.172   | 38  |
| choline chloride                    | urea               | 1:2                  | 313.15          | 12.50          | 5.1646 | 0.309   | 38  |
| choline chloride                    | urea               | 1:2                  | 323.15          | 11.10          | 4.2934 | 0.271   | 38  |
| choline chloride                    | urea               | 1:2                  | 333.15          | 12.73          | 4.2721 | 0.270   | 38  |
| choline chloride                    | urea               | 1:2.5                | 313.15          | 12.45          | 3.0767 | 0.203   | 38  |
| choline chloride                    | urea               | 1:2.5                | 323.15          | 12.28          | 2.7600 | 0.186   | 38  |
| choline chloride                    | urea               | 1:2.5                | 333.15          | 12.55          | 2.4390 | 0.168   | 38  |
| choline chloride                    | glycerol           | 1:2                  | 303.15          | 5.863          | 3.6929 | 0.2859  | 51  |
| choline chloride                    | glycerol           | 1:2                  | 313.15          | 5.991          | 3.0718 | 0.2490  | 51  |
| choline chloride                    | glycerol           | 1:2                  | 323.15          | 6.170          | 2.6508 | 0.2224  | 51  |
| choline chloride                    | glycerol           | 1:2                  | 333.15          | 6.265          | 2.1243 | 0.1865  | 51  |
| choline chloride                    | glycerol           | 1:2                  | 343.15          | 6.347          | 1.6010 | 0.1473  | 51  |
| choline chloride                    | triethylene glycol | 1:4                  | 298.15          | 1              | 0.2954 | 0.0419  | 59  |
| choline chloride                    | ethylene glycol    | 1:4                  | 298.15          | 1              | 0.3034 | 0.0230  | 59  |
| choline chloride                    | ethylene glycol    | 1:8                  | 298.15          | 1              | 0.3806 | 0.0262  | 59  |
| choline chloride                    | urea               | 1:4                  | 298.15          | 1              | 0.3237 | 0.0240  | 59  |
| choline chloride                    | urea               | 1:2.5                | 298.15          | 1              | 0.2604 | 0.0211  | 59  |
| choline chloride                    | glycerol           | 1:3                  | 298.15          | 1              | 0.4574 | 0.0454  | 59  |
| choline chloride                    | glycerol           | 1:8                  | 298.15          | 1              | 0.3242 | 0.0306  | 59  |
| choline chloride                    | ethanolamine       | 1:6                  | 298.15          | 1              | 1.7025 | 0.1096  | 59  |
| choline chloride                    | diethanolamine     | 1:6                  | 298.15          | 1              | 0.9260 | 0.0925  | 59  |
| benzyltriphenylphosphonium chloride | glycerol           | 1:12                 | 298.15          | 1              | 0.4686 | 0.0511  | 59  |
| butyltriphenylphosphonium bromide   | ethylene glycol    | 1:12                 | 298.15          | 1              | 0.6018 | 0.0503  | 59  |
| methyltriphenylphosphonium bromide  | ethanolamine       | 1:6                  | 298.15          | 1              | 1.6286 | 0.1441  | 59  |
| methyltriphenylphosphonium bromide  | ethanolamine       | 1:7                  | 298.15          | 1              | 1.4617 | 0.1254  | 59  |
| methyltriphenylphosphonium bromide  | ethanolamine       | 1:8                  | 298.15          | 1              | 1.4360 | 0.1189  | 59  |
| tetrabutylammonium bromide          | ethanolamine       | 1:6                  | 298.15          | 1              | 1.3438 | 0.1168  | 59  |
| tetrabutylammonium bromide          | diethanolamine     | 1:6                  | 298.15          | 1              | 0.8487 | 0.1036  | 59  |
| tetrabutylammonium bromide          | triethanolamine    | 1:3                  | 298.15          | 1              | 0.4702 | 0.0830  | 59  |
| choline chloride                    | urea               | 1:2                  | 303.15          | 5.654          | 3.5592 | 0.2355  | 25  |
| choline chloride                    | urea               | 1:2                  | 313.15          | 5.722          | 3.1151 | 0.2124  | 25  |
| choline chloride                    | urea               | 1:2                  | 323.15          | 5.782          | 2.7870 | 0.1944  | 25  |
| choline chloride                    | urea               | 1:2                  | 333.15          | 5.845          | 2.3945 | 0.1717  | 25  |
| choline chloride                    | urea               | 1:2                  | 343.15          | 5.911          | 1.9860 | 0.1467  | 25  |
| choline chloride                    | phenol             | 1:2                  | 293.15          | 0.494          | 0.1945 | 0.0208  | 48  |
| choline chloride                    | phenol             | 1:2                  | 303.15          | 0.510          | 0.1587 | 0.0170  | 48  |
| choline chloride                    | phenol             | 1:2                  | 313.15          | 0.503          | 0.1380 | 0.0149  | 48  |
| choline chloride                    | phenol             | 1:2                  | 323.15          | 0.520          | 0.1054 | 0.0114  | 48  |
| choline chloride                    | phenol             | 1:3                  | 293.15          | 0.508          | 0.2052 | 0.0212  | 48  |
| choline chloride                    | phenol             | 1:3                  | 303.15          | 0.514          | 0.1707 | 0.0177  | 48  |
| choline chloride                    | phenol             | 1:3                  | 313.15          | 0.507          | 0.1499 | 0.0156  | 48  |
| choline chloride                    | phenol             | 1:3                  | 323.15          | 0.513          | 0.1276 | 0.0133  | 48  |
| choline chloride                    | phenol             | 1:4                  | 293.15          | 0.509          | 0.2108 | 0.0213  | 48  |
| choline chloride                    | phenol             | 1:4                  | 303.15          | 0.523          | 0.1692 | 0.0172  | 48  |
| choline chloride                    | phenol             | 1:4                  | 313.15          | 0.504          | 0.1542 | 0.0157  | 48  |
| choline chloride                    | phenol             | 1:4                  | 323.15          | 0.529          | 0.1300 | 0.0132  | 48  |
| choline chloride                    | diethylene glycol  | 1:3                  | 293.15          | 0.513          | 0.1687 | 0.0189  | 48  |
| choline chloride                    | diethylene glycol  | 1:3                  | 303.15          | 0.524          | 0.1501 | 0.0169  | 48  |
| choline chloride                    | diethylene glycol  | 1:3                  | 313.15          | 0.515          | 0.1261 | 0.0142  | 48  |
| choline chloride                    | diethylene glycol  | 1:3                  | 323.15          | 0.518          | 0.1029 | 0.0116  | 48  |
| choline chloride                    | diethylene glycol  | 1:4                  | 293.15          | 0.509          | 0.1852 | 0.0205  | 48  |
| choline chloride                    | diethylene glycol  | 1:4                  | 303.15          | 0.519          | 0.1509 | 0.0167  | 48  |
| choline chloride                    | diethylene glycol  | 1:4                  | 313.15          | 0.518          | 0.1326 | 0.0147  | 48  |
| choline chloride                    | diethylene glycol  | 1:4                  | 323.15          | 0.527          | 0.1084 | 0.0121  | 48  |
| choline chloride                    | triethylene glycol | 1:3                  | 293.15          | 0.504          | 0.1909 | 0.0274  | 48  |
| choline chloride                    | triethylene glycol | 1:3                  | 303.15          | 0.512          | 0.1612 | 0.0232  | 48  |
| choline chloride                    | triethylene glycol | 1:3                  | 313.15          | 0.510          | 0.1340 | 0.0194  | 48  |
| choline chloride                    | triethylene glycol | 1:3                  | 323.15          | 0.516          | 0.1126 | 0.0163  | 48  |
| choline chloride                    | triethylene glycol | 1:4                  | 293.15          | 0.513          | 0.1941 | 0.0280  | 48  |
| choline chloride                    | triethylene glycol | 1:4                  | 303.15          | 0.513          | 0.1708 | 0.0247  | 48  |
| choline chloride                    | triethylene glycol | 1:4                  | 313.15          | 0.519          | 0.1390 | 0.0202  | 48  |
| choline chloride                    | triethylene glycol | 1:4                  | 323.15          | 0.520          | 0.1144 | 0.0167  | 48  |
| choline chloride                    | ethylene glycol    | 1:2                  | 303.15          | 5.863          | 3.1265 | 0.2156  | 26  |
| choline chloride                    | ethylene glycol    | 1:2                  | 313.15          | 5.902          | 2.6142 | 0.1870  | 26  |
| choline chloride                    | ethylene glycol    | 1:2                  | 323.15          | 6.167          | 2.1903 | 0.1615  | 26  |
| choline chloride                    | ethylene glycol    | 1:2                  | 333.15          | 6.104          | 1.5824 | 0.1221  | 26  |
| choline chloride                    | ethylene glycol    | 1:2                  | 343.15          | 6.323          | 1.2168 | 0.0966  | 26  |
| choline chloride                    | 1,4-butanediol     | 1:3                  | 293.15          | 0.509          | 0.1624 | 0.0164  | 31  |
| choline chloride                    | 1,4-butanediol     | 1:3                  | 303.15          | 0.495          | 0.1410 | 0.0142  | 31  |

|                              |                       |            |         |         |        |        |    |
|------------------------------|-----------------------|------------|---------|---------|--------|--------|----|
| choline chloride             | 1,4-butanediol        | 1:3        | 313.15  | 0.503   | 0.1196 | 0.0121 | 31 |
| choline chloride             | 1,4-butanediol        | 1:3        | 323.15  | 0.526   | 0.1014 | 0.0103 | 31 |
| choline chloride             | 1,4-butanediol        | 1:4        | 293.15  | 0.513   | 0.1560 | 0.0154 | 31 |
| choline chloride             | 1,4-butanediol        | 1:4        | 303.15  | 0.503   | 0.1364 | 0.0135 | 31 |
| choline chloride             | 1,4-butanediol        | 1:4        | 313.15  | 0.507   | 0.1208 | 0.0119 | 31 |
| choline chloride             | 1,4-butanediol        | 1:4        | 323.15  | 0.519   | 0.1031 | 0.0102 | 31 |
| choline chloride             | 2,3-butanediol        | 1:3        | 293.15  | 0.511   | 0.1501 | 0.0152 | 31 |
| choline chloride             | 2,3-butanediol        | 1:3        | 303.15  | 0.513   | 0.1377 | 0.0139 | 31 |
| choline chloride             | 2,3-butanediol        | 1:3        | 313.15  | 0.529   | 0.1251 | 0.0127 | 31 |
| choline chloride             | 2,3-butanediol        | 1:3        | 323.15  | 0.514   | 0.1140 | 0.0116 | 31 |
| choline chloride             | 2,3-butanediol        | 1:4        | 293.15  | 0.500   | 0.1915 | 0.0188 | 31 |
| choline chloride             | 2,3-butanediol        | 1:4        | 303.15  | 0.511   | 0.1695 | 0.0167 | 31 |
| choline chloride             | 2,3-butanediol        | 1:4        | 313.15  | 0.511   | 0.1469 | 0.0145 | 31 |
| choline chloride             | 2,3-butanediol        | 1:4        | 323.15  | 0.512   | 0.1320 | 0.0130 | 31 |
| choline chloride             | 1,2-propanediol       | 1:3        | 293.15  | 0.514   | 0.1827 | 0.0165 | 31 |
| choline chloride             | 1,2-propanediol       | 1:3        | 303.15  | 0.517   | 0.1543 | 0.0140 | 31 |
| choline chloride             | 1,2-propanediol       | 1:3        | 313.15  | 0.515   | 0.1264 | 0.0115 | 31 |
| choline chloride             | 1,2-propanediol       | 1:3        | 323.15  | 0.524   | 0.1031 | 0.0094 | 31 |
| choline chloride             | 1,2-propanediol       | 1:4        | 293.15  | 0.501   | 0.1884 | 0.0165 | 31 |
| choline chloride             | 1,2-propanediol       | 1:4        | 303.15  | 0.517   | 0.1474 | 0.0129 | 31 |
| choline chloride             | 1,2-propanediol       | 1:4        | 313.15  | 0.525   | 0.1208 | 0.0106 | 31 |
| choline chloride             | 1,2-propanediol       | 1:4        | 323.15  | 0.520   | 0.0989 | 0.0087 | 31 |
| choline chloride             | levulinic acid        | 1:3        | 303.15  | 0.570   | 0.2549 | 0.0320 | 49 |
| choline chloride             | levulinic acid        | 1:3        | 313.15  | 0.580   | 0.2180 | 0.0259 | 49 |
| choline chloride             | levulinic acid        | 1:3        | 323.15  | 0.579   | 0.1738 | 0.0208 | 49 |
| choline chloride             | levulinic acid        | 1:3        | 333.15  | 0.583   | 0.1526 | 0.0183 | 49 |
| choline chloride             | levulinic acid        | 1:4        | 303.15  | 0.575   | 0.2700 | 0.0316 | 49 |
| choline chloride             | levulinic acid        | 1:4        | 313.15  | 0.566   | 0.2319 | 0.0273 | 49 |
| choline chloride             | levulinic acid        | 1:4        | 323.15  | 0.584   | 0.1937 | 0.0229 | 49 |
| choline chloride             | levulinic acid        | 1:4        | 333.15  | 0.587   | 0.1562 | 0.0185 | 49 |
| choline chloride             | levulinic acid        | 1:5        | 303.15  | 0.566   | 0.2869 | 0.0333 | 49 |
| choline chloride             | levulinic acid        | 1:5        | 313.15  | 0.573   | 0.2410 | 0.0281 | 49 |
| choline chloride             | levulinic acid        | 1:5        | 323.15  | 0.580   | 0.2038 | 0.0239 | 49 |
| choline chloride             | levulinic acid        | 1:5        | 333.15  | 0.581   | 0.1694 | 0.0199 | 49 |
| choline chloride             | furfuryl alcohol      | 1:3        | 303.15  | 0.583   | 0.1856 | 0.0197 | 49 |
| choline chloride             | furfuryl alcohol      | 1:3        | 313.15  | 0.581   | 0.1618 | 0.0173 | 49 |
| choline chloride             | furfuryl alcohol      | 1:3        | 323.15  | 0.585   | 0.1383 | 0.0148 | 49 |
| choline chloride             | furfuryl alcohol      | 1:3        | 333.15  | 0.586   | 0.1208 | 0.0129 | 49 |
| choline chloride             | furfuryl alcohol      | 1:4        | 303.15  | 0.581   | 0.2196 | 0.0228 | 49 |
| choline chloride             | furfuryl alcohol      | 1:4        | 313.15  | 0.569   | 0.1753 | 0.0183 | 49 |
| choline chloride             | furfuryl alcohol      | 1:4        | 323.15  | 0.566   | 0.1566 | 0.0164 | 49 |
| choline chloride             | furfuryl alcohol      | 1:4        | 333.15  | 0.585   | 0.1389 | 0.0146 | 49 |
| choline chloride             | furfuryl alcohol      | 1:5        | 303.15  | 0.577   | 0.2276 | 0.0234 | 49 |
| choline chloride             | furfuryl alcohol      | 1:5        | 313.15  | 0.570   | 0.1924 | 0.0198 | 49 |
| choline chloride             | furfuryl alcohol      | 1:5        | 323.15  | 0.573   | 0.1743 | 0.0180 | 49 |
| choline chloride             | furfuryl alcohol      | 1:5        | 333.15  | 0.577   | 0.1486 | 0.0154 | 49 |
| tetramethylammonium chloride | lactic acid           | 1:2        | 308.15  | 1.992   | 0.6471 | 0.0588 | 60 |
| tetraethylammonium chloride  | lactic acid           | 1:2        | 308.15  | 1.993   | 0.8207 | 0.0725 | 60 |
| tetrabutylammonium chloride  | lactic acid           | 1:2        | 308.15  | 1.992   | 0.9546 | 0.1272 | 60 |
| tetramethylammonium chloride | lactic acid           | 1:2        | 318.15  | 1.993   | 0.5487 | 0.0503 | 60 |
| tetraethylammonium chloride  | lactic acid           | 1:2        | 318.15  | 1.992   | 0.6866 | 0.0614 | 60 |
| tetrabutylammonium chloride  | lactic acid           | 1:2        | 318.15  | 1.992   | 0.8117 | 0.1103 | 60 |
| choline chloride             | lactic acid           | 1:2        | 303.29  | 0.829   | 0.2386 | 0.0248 | 61 |
| choline chloride             | lactic acid           | 1:2        | 303.29  | 1.655   | 0.4896 | 0.0496 | 61 |
| choline chloride             | lactic acid           | 1:2        | 303.29  | 2.580   | 0.7519 | 0.0742 | 61 |
| choline chloride             | lactic acid           | 1:2        | 303.29  | 3.591   | 1.0367 | 0.0995 | 61 |
| choline chloride             | urea-H <sub>2</sub> O | 1:2:0.0185 | 308.2   | 4.376   | 2.1289 | 0.1690 | 28 |
| choline chloride             | urea-H <sub>2</sub> O | 1:2:0.0185 | 318.2   | 4.352   | 1.8302 | 0.1470 | 28 |
| choline chloride             | urea-H <sub>2</sub> O | 1:2:0.0185 | 328.2   | 4.480   | 1.7233 | 0.1390 | 28 |
| choline chloride             | urea-H <sub>2</sub> O | 1:2:0.0910 | 308.2   | 4.504   | 1.8840 | 0.1510 | 28 |
| choline chloride             | urea-H <sub>2</sub> O | 1:2:0.0910 | 318.2   | 4.356   | 1.7233 | 0.1390 | 28 |
| choline chloride             | urea-H <sub>2</sub> O | 1:2:0.0910 | 328.2   | 4.457   | 1.5909 | 0.1290 | 28 |
| choline chloride             | urea-H <sub>2</sub> O | 1:2:0.183  | 308.2   | 4.499   | 1.7766 | 0.1430 | 28 |
| choline chloride             | urea-H <sub>2</sub> O | 1:2:0.183  | 318.2   | 4.396   | 1.6041 | 0.1300 | 28 |
| choline chloride             | urea-H <sub>2</sub> O | 1:2:0.183  | 328.2   | 4.486   | 1.3432 | 0.1100 | 28 |
| choline chloride             | glycerol-MTBD         | 1:2:6      | ambient | ambient | 2.2727 | 0.2389 | 27 |
| choline chloride             | glycerol-DBU          | 1:2:6      | ambient | ambient | 0.8068 | 0.0998 | 27 |
| choline chloride             | glycerol-DBN          | 1:2:6      | ambient | ambient | 2.3410 | 0.2175 | 27 |
| choline chloride             | glycerol-DBN          | 1:2:3      | ambient | ambient | 2.1818 | 0.2021 | 27 |
| choline chloride             | glycerol-DBN          | 1:2:7      | ambient | ambient | 2.3864 | 0.2216 | 27 |
| choline chloride             | glycerol-DBN          | 1:2:8      | ambient | ambient | 2.3409 | 0.2189 | 27 |
| choline chloride             | glycerol-DBN          | 1:3:10     | ambient | ambient | 2.3636 | 0.2187 | 27 |
| choline chloride             | urea-H <sub>2</sub> O | 1:2:50%w   | 313.2   | 0.7841  | —      | 0.111  | 62 |
| choline chloride             | urea-H <sub>2</sub> O | 1:2:50%w   | 333.2   | 0.8567  | —      | 0.107  | 62 |
| choline chloride             | urea-H <sub>2</sub> O | 1:2:50%w   | 353.2   | 0.7836  | —      | 0.097  | 62 |
| choline chloride             | urea-H <sub>2</sub> O | 1:2:60%w   | 313.2   | 0.8061  | —      | 0.103  | 62 |
| choline chloride             | urea-H <sub>2</sub> O | 1:2:60%w   | 333.2   | 0.9036  | —      | 0.102  | 62 |
| choline chloride             | urea-H <sub>2</sub> O | 1:2:60%w   | 353.2   | 0.8834  | —      | 0.096  | 62 |

|                  |                           |           |       |        |   |       |    |
|------------------|---------------------------|-----------|-------|--------|---|-------|----|
| choline chloride | urea-H <sub>2</sub> O     | 1:2:70%w  | 313.2 | 0.8096 | — | 0.097 | 62 |
| choline chloride | urea-H <sub>2</sub> O     | 1:2:70%w  | 333.2 | 0.9246 | — | 0.097 | 62 |
| choline chloride | urea-H <sub>2</sub> O     | 1:2:70%w  | 353.2 | 0.8757 | — | 0.088 | 62 |
| choline chloride | urea-H <sub>2</sub> O-MEA | 50%w-15%w | 313.2 | 0.8185 | — | 0.229 | 62 |
| choline chloride | urea-H <sub>2</sub> O-MEA | 50%w-15%w | 333.2 | 0.8558 | — | 0.181 | 62 |
| choline chloride | urea-H <sub>2</sub> O-MEA | 50%w-15%w | 353.2 | 0.8041 | — | 0.197 | 62 |
| choline chloride | urea-H <sub>2</sub> O-MEA | 60%w-10%w | 313.2 | 0.8253 | — | 0.202 | 62 |
| choline chloride | urea-H <sub>2</sub> O-MEA | 60%w-10%w | 333.2 | 0.8349 | — | 0.181 | 62 |
| choline chloride | urea-H <sub>2</sub> O-MEA | 60%w-10%w | 353.2 | 0.8588 | — | 0.171 | 62 |
| choline chloride | urea-H <sub>2</sub> O-MEA | 70%w-5%w  | 313.2 | 0.8133 | — | 0.189 | 62 |
| choline chloride | urea-H <sub>2</sub> O-MEA | 70%w-5%w  | 333.2 | 0.8294 | — | 0.171 | 62 |
| choline chloride | urea-H <sub>2</sub> O-MEA | 70%w-5%w  | 353.2 | 0.8086 | — | 0.148 | 62 |

**Table S2** Viscosity of different DESs

| Salt                                   | HBD                                  | Molar ratio (Salt:HBD) | Viscosity (mPa.s) | Temperature (K) | Ref |
|----------------------------------------|--------------------------------------|------------------------|-------------------|-----------------|-----|
| choline chloride                       | urea                                 | 1:2                    | 1571              | 298.15          | 28  |
| choline chloride                       | glucose                              | 1:1                    | 34400             | 323.15          | 46  |
| choline chloride                       | glucose                              | 1:1                    | 4470              | 343.15          | 46  |
| choline chloride                       | glucose                              | 1:1                    | 560               | 373.15          | 46  |
| choline chloride                       | xylitol                              | 1:1                    | 5230              | 303.15          | 46  |
| choline chloride                       | xylitol                              | 1:1                    | 860               | 323.15          | 46  |
| choline chloride                       | xylitol                              | 1:1                    | 250               | 343.15          | 46  |
| choline chloride                       | sorbitol                             | 1:1                    | 12730             | 303.15          | 46  |
| choline chloride                       | sorbitol                             | 1:1                    | 2000              | 323.15          | 46  |
| choline chloride                       | sorbitol                             | 1:1                    | 480               | 343.15          | 46  |
| tetrabutylammonium bromide             | ethylene glycole                     | 1:1.5                  | 150               | 303.15          | 45  |
| tetrabutylammonium bromide             | 1,3-ropandiol                        | 1:1.5                  | 220               | 303.15          | 45  |
| tetrabutylammonium bromide             | 1,5-pentandiol                       | 1:1.5                  | 300               | 333.15          | 45  |
| tetrabutylammonium bromide             | glycerol                             | 1:3                    | 467.2             | 303.15          | 45  |
| choline chloride                       | oxalic acid                          | 1:1                    | 585.28            | 303.15          | 52  |
| choline chloride                       | ethylene glycole                     | 1:1                    | 33.911            | 303.15          | 52  |
| choline chloride                       | triethanolamine                      | 1:1                    | 80.732            | 303.15          | 52  |
| tetrapropylammonium bromide            | ethylene glycol                      | 1:3                    | 5.2               | 303.15          | 53  |
| tetrapropylammonium bromide            | ethylene glycol                      | 1:3                    | 86.1              | 293.15          | 53  |
| tetrapropylammonium bromide            | ethylene glycol                      | 1:3                    | 8.6               | 353.15          | 53  |
| tetrapropylammonium bromide            | ethylene glycol                      | 1:5                    | 32.8              | 303.15          | 53  |
| tetrapropylammonium bromide            | triethylene glycol                   | 1:2.5                  | 78.2              | 303.15          | 53  |
| tetrapropylammonium bromide            | triethylene glycol                   | 1:4                    | 61.8              | 303.15          | 53  |
| tetrapropylammonium bromide            | triethylene glycol                   | 1:4                    | 117.0             | 293.15          | 53  |
| tetrapropylammonium bromide            | triethylene glycol                   | 1:4                    | 11.8              | 353.15          | 53  |
| tetrapropylammonium bromide            | glycerol                             | 1:2                    | 1510              | 293.15          | 53  |
| tetrapropylammonium bromide            | glycerol                             | 1:4                    | 80                | 293.15          | 53  |
| tetrapropylammonium bromide            | glycerol                             | 1:4                    | 33                | 352.75          | 53  |
| potassium carbonate                    | glycerol                             | 1:4                    | 29107.4           | 293.15          | 54  |
| potassium carbonate                    | glycerol                             | 1:5                    | 8018.2            | 293.15          | 54  |
| potassium carbonate                    | glycerol                             | 1:6                    | 5500.0            | 293.15          | 54  |
| choline chloride                       | malonic acid                         | 1:1                    | 828.70            | 298.15          | 55  |
| choline chloride                       | oxalic acid                          | 1:1                    | 458.40            | 298.15          | 55  |
| choline chloride                       | triethanolamine                      | 1:2                    | 838.82            | 298.15          | 55  |
| choline chloride                       | zinc nitrate hexahydrate             | 1:1                    | 106.70            | 298.15          | 55  |
| choline chloride                       | 2,2,2-trifluoroacetamide             | 1:2                    | 77.30             | 298.15          | 55  |
| n,n-diethylenethanol ammonium chloride | malonic acid                         | 1:1                    | 541.10            | 298.15          | 55  |
| n,n-diethylenethanol ammonium chloride | zinc nitrate hexahydrate             | 1:1                    | 163.40            | 298.15          | 55  |
| choline chloride                       | urea                                 | 1:2                    | 632               | 298.15          | 55  |
| choline chloride                       | ethylene glycol                      | 1:2                    | 36                | 298.15          | 12  |
| choline chloride                       | glycerol                             | 1:2                    | 376               | 298.15          | 12  |
| choline chloride                       | malonic acid                         | 1:1                    | 721               | 298.15          | 12  |
| choline chloride                       | chromium chloride. 6H <sub>2</sub> O |                        | 2346              | 298.15          | 12  |
| choline chloride                       | ethylene glycol                      | 1:2                    | 41                | 298.15          | 63  |
| choline chloride                       | ethylene glycol                      | 1:3                    | 26                | 298.15          | 63  |
| choline chloride                       | ethylene glycol                      | 1:4                    | 25                | 298.15          | 63  |
| choline chloride                       | ethylene glycol                      | 1:5                    | 22                | 298.15          | 63  |
| choline chloride                       | triethylene glycol                   | 1:3                    | 66                | 298.15          | 63  |
| choline chloride                       | triethylene glycol                   | 1:4                    | 62                | 298.15          | 63  |
| choline chloride                       | triethylene glycol                   | 1:5                    | 5                 | 298.15          | 63  |
| choline chloride                       | triethylene glycol                   | 1:6                    | 45                | 298.15          | 63  |
| choline chloride                       | urea                                 | 1:1.5                  | 821               | 293.15          | 63  |
| choline chloride                       | urea                                 | 1:2                    | 750               | 293.15          | 63  |
| choline chloride                       | urea                                 | 1:2.5                  | 636               | 293.15          | 63  |
| choline chloride                       | malonic acid                         | 2:1                    | 1460              | 293.15          | 63  |
| choline chloride                       | malonic acid                         | 1:1                    | 417               | 293.15          | 63  |
| choline chloride                       | malonic acid                         | 1:2                    | 800               | 293.15          | 63  |
| tetrabutylammonium chloide             | glycerol                             | 1:3                    | 580               | 303.15          | 63  |
| tetrabutylammonium chloide             | glycero                              | 1:4                    | 476.1             | 303.15          | 63  |
| tetrabutylammonium chloide             | glycerol                             | 1:5                    | 541.3             | 303.15          | 63  |
| tetrabutylammonium chloide             | ethylene glycol                      | 1:2                    | 127               | 303.15          | 63  |
| tetrabutylammonium chloide             | ethylene lycol                       | 1:3                    | 71.9              | 303.15          | 63  |
| tetrabutylammonium chloide             | ethylene glycol                      | 1:4                    | 56.9              | 303.15          | 63  |
| tetrabutylammonium chloide             | triethylene glycol                   | 1:1                    | 543.8             | 303.15          | 63  |
| tetrabutylammonium chloide             | triethylene glycol                   | 2:1                    | 1399              | 303.15          | 63  |
| tetrabutylammonium chloide             | triethylene glyco                    | 4:1                    | 3265.3            | 303.15          | 63  |
| choline chloride                       | phenol                               | 1:2                    | 90.33             | 298.15          | 64  |
| choline chloride                       | phenol                               | 1:3                    | 44.64             | 298.15          | 64  |
| choline chloride                       | phenol                               | 1:4                    | 31.55             | 298.15          | 64  |
| choline chloride                       | phenol                               | 1:5                    | 25.25             | 298.15          | 64  |
| choine chloride                        | o-cresol                             | 1:2                    | 207.41            | 298.15          | 64  |
| choline chloride                       | o-cresol                             | 1:3                    | 77.65             | 298.15          | 64  |
| choline chloride                       | o-cresol                             | 1:3.91                 | 46.95             | 298.15          | 64  |
| choline chloride                       | o-cresol                             | 1:5                    | 34.90             | 298.15          | 64  |

|                                    |                           |        |           |        |    |
|------------------------------------|---------------------------|--------|-----------|--------|----|
| choline chloride                   | o-cresol                  | 1:6    | 27.82     | 298.15 | 64 |
| choline chloride                   | urea                      | 1:2    | 1371.9719 | 293.15 | 65 |
| choline chloride                   | urea                      | 1:2    | 527.2786  | 303.15 | 65 |
| choline chloride                   | urea                      | 1:2    | 238.0763  | 313.15 | 65 |
| choline chloride                   | urea                      | 1:2    | 119.8049  | 323.15 | 65 |
| choline chloride                   | urea                      | 1:2    | 68.6478   | 333.15 | 65 |
| choline chloride                   | urea                      | 1:2    | 41.9612   | 343.15 | 65 |
| choline chloride                   | urea                      | 1:2    | 28.1053   | 353.15 | 65 |
| choline chloride                   | urea                      | 1:2    | 19.9490   | 363.15 | 65 |
| choline chloride                   | glycolic acid             | 1:1    | 547.9     | 298.15 | 66 |
| choline chloride                   | oxalic acid               | 1:1    | 8953      | 298.15 | 66 |
| choline chloride                   | malonic acid              | 1:1    | 1389      | 298.15 | 66 |
| choline chloride                   | levulinic acid            | 1:2    | 226.8     | 298.15 | 66 |
| choline chloride                   | glutaric acid             | 1:1    | 2015      | 298.15 | 66 |
| tetramethyl ammonium chloride      | lactic acid               | 1:2    | 1197.6    | 293.15 | 66 |
| tetramethyl ammonium chloride      | lactic acid               | 1:2    | 756.29    | 298.15 | 66 |
| tetramethyl ammonium chloride      | lactic acid               | 1:2    | 46.64     | 303.15 | 66 |
| tetramethyl ammonium chloride      | lactic acid               | 1:2    | 337.20    | 308.15 | 66 |
| tetramethyl ammonium chloride      | lactic acid               | 1:2    | 235.85    | 313.15 | 66 |
| tetramethyl ammonium chloride      | lactic acid               | 1:2    | 169.58    | 318.15 | 66 |
| tetraethyl ammonium chloride       | lactic acid               | 1:2    | 67309     | 293.15 | 66 |
| tetraethyl ammonium chloride       | lactic acid               | 1:2    | 440.74    | 298.15 | 66 |
| tetraethyl ammonium chloride       | lactic acid               | 1:2    | 299.04    | 303.15 | 66 |
| tetraethyl ammonium chloride       | lactic acid               | 1:2    | 209.31    | 308.15 | 66 |
| tetraethyl ammonium chloride       | lactic acid               | 1:2    | 150.8     | 313.15 | 66 |
| tetraethyl ammonium chloride       | lactic acid               | 1:2    | 111.50    | 318.15 | 66 |
| tetrabutyl ammonium chloride       | lactic acid               | 1:2    | 1435.4    | 293.15 | 66 |
| tetrabutyl ammonium chloride       | lactic acid               | 1:2    | 890.73    | 298.15 | 66 |
| tetrabutyl ammonium chloride       | lactic acid               | 1:2    | 570.60    | 303.15 | 66 |
| tetrabutyl ammonium chloride       | lactic acid               | 1:2    | 378.68    | 308.15 | 66 |
| tetrabutyl ammonium chloride       | lactic acid               | 1:2    | 259.54    | 313.15 | 66 |
| tetrabutyl ammonium chloride       | lactic acid               | 1:2    | 183.16    | 318.15 | 66 |
| cholin chloride                    | urea                      | 1:2    | 449       | 303.15 | 67 |
| cholin chloride                    | glycerol                  | 1:2    | 246.79    | 303.15 | 68 |
| cholin chloride                    | ethylene glycol           | 1:2    | 35        | 303.15 | 67 |
| cholin chloride                    | glycolic acid             | 1:1    | 394.15    | 303.15 | 66 |
| cholin chloride                    | levulinic acid            | 1:2    | 164.5     | 303.15 | 66 |
| cholin chloride                    | phenol                    | 1:3    | 35.17     | 303.15 | 64 |
| n,n-diethylammonium chloride       | glycerol                  | 1:2    | 351.46    | 303.15 | 69 |
| n,n-diethylammonium chloride       | ethylene glycol           | 1:2    | 40.68     | 303.15 | 69 |
| tetrapropylammonium bromide        | ethylene glycol           | 1:3    | 58.2      | 303.15 | 53 |
| tetrapropylammonium bromide        | triethylene glycol        | 1:3    | 71.9      | 303.15 | 53 |
| tetrabutylammonium chloride        | glycerol                  | 1:4    | 476.1     | 303.15 | 70 |
| tetrabutylammonium chloride        | ethylene glycol           | 1:4    | 56.90     | 303.15 | 70 |
| tetrabutylammonium bromide         | glycerol                  | 1:3    | 467.2     | 303.15 | 45 |
| tetrabutylammonium bromide         | ethylene glycol           | 1:3    | 77        | 303.15 | 45 |
| tetrabutylammonium bromide         | 1,3-propanediol           | 1:3    | 135       | 333.15 | 45 |
| tetrabutylammonium bromide         | 1,5-propanediol           | 1:3    | 183       | 303.15 | 45 |
| methyltriphenylphosphonium bromide | ethylene glycol           | 1:4    | 109.8     | 298.15 | 71 |
| methyltriphenylphosphonium bromide | 2,2,2- trifluoroacetamide | 1:8    | 136.15    | 298.15 | 71 |
| methyltriphenylphosphonium bromide | glycerol                  | 1:1.75 | 887.1     | 318.15 | 71 |
| methyltriphenylphosphonium bromide | ethylene glycol           | 1:4    | 109.8     | 298.15 | 71 |
| methyltriphenylphosphonium bromide | ethylene glycol           | 1:4    | 68.6      | 308.15 | 71 |
| methyltriphenylphosphonium bromide | trifluoroacetamide        | 1:8    | 136.5     | 298.15 | 71 |
| methyltriphenylphosphonium bromide | trifluoroacetamide        | 1:8    | 71.3      | 308.15 | 71 |
| cholin chloride                    | d-glucose                 | 1:1    | 9037.1    | 298.15 | 72 |
| cholin chloride                    | d-glucose                 | 1.5:1  | 8000      | 298.15 | 72 |
| cholin chloride                    | d-glucose                 | 2:1    | 8045.1    | 298.15 | 72 |
| cholin chloride                    | d-glucose                 | 2.5:1  | 10910     | 298.15 | 72 |

**Table S3** CO<sub>2</sub> solubility in conventional ILs and their aqueous solutions

| IL                                                                     | Temperature (K) | Pressure (MPa) | m <sub>CO2</sub> | Ref. |
|------------------------------------------------------------------------|-----------------|----------------|------------------|------|
| [C <sub>4</sub> MIM][PF <sub>6</sub> ]                                 | 298.05          | 2.00           | 1.444            | 73   |
| [C <sub>4</sub> MIM][BF <sub>4</sub> ]                                 | 298.05          | 2.00           | 1.695            | 73   |
| [C <sub>4</sub> MIM][TFA]                                              | 298.02          | 2.24           | 1.572            | 57   |
| [C <sub>4</sub> MIM][TFA]                                              | 313.13          | 2.34           | 1.443            | 57   |
| [C <sub>4</sub> MIM][TFA]                                              | 333.26          | 2.46           | 1.060            | 57   |
| [C <sub>4</sub> MIM][DCA]                                              | 298.20          | 2.50           | 1.970            | 34   |
| [C <sub>4</sub> MIM][Tf <sub>2</sub> N]                                | 298.20          | 2.08           | 1.667            | 34   |
| [C <sub>6</sub> MIM][Tf <sub>2</sub> N]                                | 298.20          | 2.20           | 1.724            | 34   |
| [C <sub>8</sub> MIM][Tf <sub>2</sub> N]                                | 298.20          | 2.27           | 1.734            | 34   |
| [C <sub>4</sub> MIM][TfO]                                              | 298.20          | 2.07           | 1.814            | 34   |
| [C <sub>8</sub> MIM][PF <sub>6</sub> ]                                 | 313.15          | 1.80           | 0.897            | 35   |
| [C <sub>8</sub> MIM][PF <sub>6</sub> ]                                 | 323.15          | 1.60           | 0.843            | 35   |
| [C <sub>8</sub> MIM][PF <sub>6</sub> ]                                 | 333.15          | 1.74           | 0.969            | 35   |
| [C <sub>4</sub> MIM][NO <sub>3</sub> ]                                 | 313.15          | 1.55           | 1.211            | 35   |
| [C <sub>4</sub> MIM][NO <sub>3</sub> ]                                 | 323.15          | 1.71           | 1.011            | 35   |
| [C <sub>4</sub> MIM][NO <sub>3</sub> ]                                 | 333.15          | 1.84           | 1.113            | 35   |
| [C <sub>8</sub> MIM][BF <sub>4</sub> ]                                 | 313.15          | 1.73           | 0.870            | 35   |
| [C <sub>8</sub> MIM][BF <sub>4</sub> ]                                 | 323.15          | 1.56           | 0.840            | 35   |
| [C <sub>8</sub> MIM][BF <sub>4</sub> ]                                 | 333.15          | 1.56           | 0.675            | 35   |
| [N-bupy][BF <sub>4</sub> ]                                             | 313.15          | 1.55           | 0.754            | 35   |
| [N-bupy][BF <sub>4</sub> ]                                             | 323.15          | 1.66           | 0.742            | 35   |
| [N-bupy][BF <sub>4</sub> ]                                             | 333.15          | 1.87           | 0.892            | 35   |
| [C <sub>2</sub> MIM][EtSO <sub>4</sub> ]                               | 313.15          | 1.64           | 0.470            | 35   |
| [C <sub>2</sub> MIM][EtSO <sub>4</sub> ]                               | 323.15          | 1.62           | 0.486            | 35   |
| [C <sub>2</sub> MIM][EtSO <sub>4</sub> ]                               | 333.15          | 1.44           | 0.566            | 74   |
| [C <sub>4</sub> MIM][CF <sub>3</sub> CO <sub>2</sub> ]                 | 298.02          | 2.24           | 1.573            | 57   |
| [C <sub>4</sub> MIM][CF <sub>3</sub> CO <sub>2</sub> ]                 | 313.13          | 2.34           | 1.444            | 57   |
| [C <sub>4</sub> MIM][CF <sub>3</sub> CO <sub>2</sub> ]                 | 333.26          | 2.46           | 1.060            | 57   |
| [C <sub>4</sub> MIM][C <sub>7</sub> F <sub>15</sub> CO <sub>2</sub> ]  | 333.08          | 1.50           | 0.453            | 57   |
| [b2-Nic][Tf <sub>2</sub> N]                                            | 333.15          | 2.19           | 0.757            | 57   |
| [hmpy][Tf <sub>2</sub> N]                                              | 298.01          | 1.30           | 0.953            | 57   |
| [hmpy][Tf <sub>2</sub> N]                                              | 323.15          | 1.30           | 0.626            | 57   |
| [C <sub>6</sub> MIM][eFAP]                                             | 298.15          | 1.30           | 0.950            | 57   |
| [C <sub>6</sub> MIM][eFAP]                                             | 298.15          | 1.94           | 2.183            | 57   |
| [C <sub>6</sub> MIM][eFAP]                                             | 333.15          | 1.30           | 0.524            | 57   |
| [C <sub>6</sub> MIM][eFAP]                                             | 333.15          | 1.81           | 1.607            | 57   |
| [P <sub>3</sub> MIM][bFAP]                                             | 298.15          | 2.19           | 0.688            | 57   |
| [P <sub>3</sub> MIM][bFAP]                                             | 313.15          | 2.28           | 1.091            | 57   |
| [P <sub>3</sub> MIM][bFAP]                                             | 333.15          | 2.28           | 0.704            | 57   |
| [N <sub>4444</sub> ][doc]                                              | 333.31          | 2.01           | 0.348            | 57   |
| [C <sub>6</sub> H <sub>4</sub> F <sub>9</sub> MIM][Tf <sub>2</sub> N]  | 298.15          | 1.69           | 1.473            | 57   |
| [C <sub>6</sub> H <sub>4</sub> F <sub>9</sub> MIM][Tf <sub>2</sub> N]  | 313.15          | 1.73           | 1.070            | 57   |
| [C <sub>6</sub> H <sub>4</sub> F <sub>9</sub> MIM][Tf <sub>2</sub> N]  | 333.15          | 2.04           | 0.993            | 57   |
| [C <sub>8</sub> H <sub>4</sub> F <sub>13</sub> MIM][Tf <sub>2</sub> N] | 298.15          | 2.20           | 1.709            | 57   |
| [C <sub>8</sub> H <sub>4</sub> F <sub>13</sub> MIM][Tf <sub>2</sub> N] | 333.15          | 1.30           | 0.426            | 57   |
| Ecoeng 500                                                             | 333.15          | 1.49           | 0.455            | 57   |
| Ecoeng 500                                                             | 333.15          | 2.45           | 0.674            | 57   |
| Ecoeng 41M                                                             | 313.15          | 2.65           | 0.430            | 57   |
| Ecoeng 41M                                                             | 333.15          | 2.09           | 0.320            | 57   |
| [C <sub>6</sub> MIM][SAC]                                              | 333.15          | 0.30           | 0.076            | 57   |
| [C <sub>6</sub> MIM][ACE]                                              | 333.15          | 0.30           | 0.090            | 57   |
| [Choline][Tf <sub>2</sub> N]                                           | 333.15          | 2.12           | 0.870            | 57   |
| [N <sub>4111</sub> ][Tf <sub>2</sub> N]                                | 333.15          | 1.56           | 0.540            | 57   |
| [C <sub>2</sub> MIM][TFA]                                              | 298.15          | 2.00           | 1.750            | 56   |
| [C <sub>4</sub> MIM][TFA]                                              | 298.15          | 2.00           | 1.711            | 56   |
| [C <sub>2</sub> MIM][AC]                                               | 298.15          | 2.00           | 4.400            | 56   |
| [C <sub>4</sub> MIM][AC]                                               | 298.15          | 2.00           | 4.201            | 56   |
| [C <sub>2</sub> MIM][Tf <sub>2</sub> N]                                | 298.15          | 2.00           | 1.630            | 56   |
| [C <sub>6</sub> MIM][Tf <sub>2</sub> N]                                | 298.15          | 1.98           | 1.710            | 56   |
| [C <sub>6</sub> MIM][FAP]                                              | 298.15          | 2.00           | 1.601            | 56   |
| [C <sub>4</sub> MIM][TFES]                                             | 298.15          | 2.00           | 1.241            | 56   |
| [C <sub>4</sub> MIM][PRO]                                              | 298.15          | 2.00           | 3.051            | 56   |
| [C <sub>4</sub> MIM][ISB]                                              | 298.15          | 2.00           | 2.980            | 56   |
| [C <sub>4</sub> MIM][LEV]                                              | 298.15          | 2.00           | 3.350            | 56   |
| [C <sub>4</sub> MIM][SUC]                                              | 298.15          | 2.00           | 1.183            | 56   |
| [C <sub>4</sub> MIM][TMA]                                              | 298.15          | 2.00           | 3.151            | 56   |
| [TBP][FOR]                                                             | 298.15          | 2.00           | 1.750            | 56   |
| [C <sub>4</sub> MIM] <sub>2</sub> [IDA]                                | 298.15          | 2.00           | 1.590            | 56   |
| [C <sub>4</sub> MIM][IAC]                                              | 298.15          | 2.00           | 0.870            | 56   |

Table S4 Viscosity of different ILs

| IL                                                          | Viscosity (mPa-s) | Temperature (K) | Ref. |
|-------------------------------------------------------------|-------------------|-----------------|------|
| [N <sub>2224</sub> ][CH <sub>3</sub> COO]                   | 439               | 298.20          | 75   |
| [N <sub>2224</sub> ][CH <sub>3</sub> COO]                   | 306.70            | 313.20          | 75   |
| [N <sub>2224</sub> ][CH <sub>3</sub> COO]                   | 47.30             | 333.20          | 75   |
| [N <sub>2224</sub> ][CH <sub>3</sub> COO]-1H <sub>2</sub> O | 79                | 298.20          | 75   |
| [N <sub>2224</sub> ][CH <sub>3</sub> COO]-1H <sub>2</sub> O | 55.50             | 313.20          | 75   |
| [N <sub>2224</sub> ][CH <sub>3</sub> COO]-1H <sub>2</sub> O | 15.60             | 333.20          | 75   |
| [N <sub>2224</sub> ][CH <sub>3</sub> COO]-2H <sub>2</sub> O | 66                | 298.20          | 75   |
| [N <sub>2224</sub> ][CH <sub>3</sub> COO]-2H <sub>2</sub> O | 39.40             | 313.20          | 75   |
| [N <sub>2224</sub> ][CH <sub>3</sub> COO]-2H <sub>2</sub> O | 12.60             | 333.20          | 75   |
| [N <sub>2224</sub> ][CH <sub>3</sub> COO]-5H <sub>2</sub> O | 13                | 298.20          | 75   |
| [N <sub>2224</sub> ][CH <sub>3</sub> COO]-5H <sub>2</sub> O | 10.90             | 313.20          | 75   |
| [N <sub>2224</sub> ][CH <sub>3</sub> COO]-5H <sub>2</sub> O | 5.15              | 333.20          | 75   |
| [C <sub>2</sub> MIM][BF <sub>4</sub> ]                      | 36.17             | 298.15          | 76   |
| [C <sub>4</sub> MIM][BF <sub>4</sub> ]                      | 103               | 298.15          | 77   |
| [C <sub>6</sub> MIM][BF <sub>4</sub> ]                      | 145.60            | 298.15          | 78   |
| [C <sub>8</sub> MIM][BF <sub>4</sub> ]                      | 334               | 298.15          | 79   |
| [BMPY][BF <sub>4</sub> ]                                    | 177               | 298.15          | 80   |
| [C <sub>4</sub> MIM][PF <sub>6</sub> ]                      | 282               | 298.15          | 81   |
| [C <sub>6</sub> MIM][PF <sub>6</sub> ]                      | 412               | 298.15          | 78   |
| [MMIM][DMP]                                                 | 271.86            | 298.15          | 82   |
| [C <sub>2</sub> MIM][DEP]                                   | 431               | 298.15          | 82   |
| [C <sub>2</sub> MIM][ES]                                    | 87.8              | 298.15          | 82   |
| [C <sub>2</sub> MIM][HS]                                    | 1411              | 298.15          | 82   |
| [C <sub>2</sub> MIM][Ac]                                    | 143.20            | 298.15          | 82   |
| [EA][N]                                                     | 28.50             | 298.15          | 82   |
| [Et <sub>3</sub> S][Tf <sub>2</sub> N]                      | 29.20             | 298.15          | 82   |
| [O <sub>3</sub> MN][Tf <sub>2</sub> N]                      | 558               | 298.15          | 82   |
| [C <sub>2</sub> MIM][Tf <sub>2</sub> N]                     | 33.40             | 298.15          | 82   |
| [C <sub>4</sub> MIM][Tf <sub>2</sub> N]                     | 50                | 298.15          | 82   |
| [C <sub>6</sub> MIM][Tf <sub>2</sub> N]                     | 68                | 298.15          | 82   |
| [PMPYR][Tf <sub>2</sub> N]                                  | 63                | 298.15          | 82   |
| [BMPYR][Tf <sub>2</sub> N]                                  | 76.70             | 298.15          | 82   |
| [PMPYR][Tf <sub>2</sub> N]                                  | 63                | 298.15          | 82   |
| [PMPYR][Tf <sub>2</sub> N]                                  | 125               | 298.15          | 82   |
| [BMPY][Tf <sub>2</sub> N]                                   | 51.80             | 298.15          | 82   |
| [C <sub>2</sub> MIM][Tf]                                    | 41                | 298.15          | 82   |
| [C <sub>4</sub> MIM][Tf]                                    | 77                | 298.15          | 82   |
| [C <sub>4</sub> MIM][DCA]                                   | 30.10             | 298.15          | 82   |
| [BMPYR][DCA]                                                | 43.60             | 298.15          | 82   |
| [H <sub>3</sub> D <sub>3</sub> PHO][Cl]                     | 2137              | 298.15          | 82   |
| [epy][EtSO <sub>4</sub> ]                                   | 137               | 298.15          | 83   |
| [empty][EtSO <sub>4</sub> ]                                 | 150               | 298.15          | 83   |
| [Et <sub>2</sub> Nic][EtSO <sub>4</sub> ]                   | 3173              | 298.15          | 83   |
| [bmpy][Tf <sub>2</sub> N]                                   | 63                | 298.15          | 83   |
| [bmpy][BF <sub>4</sub> ]                                    | 177               | 298.15          | 83   |
| [b <sub>2</sub> Nic][Tf <sub>2</sub> N]                     | 531               | 298.15          | 83   |
| [hpy][Tf <sub>2</sub> N]                                    | 80                | 298.15          | 83   |
| [hmpy][Tf <sub>2</sub> N]                                   | 85                | 298.15          | 83   |
| [hmmpy][Tf <sub>2</sub> N]                                  | 104               | 298.15          | 83   |
| [hemmpy][Tf <sub>2</sub> N]                                 | 245               | 298.15          | 83   |
| [hpeepy][Tf <sub>2</sub> N]                                 | 206               | 298.15          | 83   |
| [hDMApy][Tf <sub>2</sub> N]                                 | 111               | 298.15          | 83   |
| [hmDMApy][Tf <sub>2</sub> N]                                | 112               | 298.15          | 83   |
| [OMPY][Tf <sub>2</sub> N]                                   | 112               | 298.15          | 83   |
| [C <sub>2</sub> MIM][Tf <sub>2</sub> N]                     | 32                | 298.15          | 83   |
| Ecoeng 41M                                                  | 1033              | 298.15          | 83   |
| [C <sub>4</sub> MIM][CH <sub>3</sub> CO <sub>2</sub> ]      | 440               | 298.15          | 83   |
| [C <sub>4</sub> MIM][CF <sub>3</sub> CO <sub>2</sub> ]      | 70                | 298.15          | 83   |
| [C <sub>6</sub> MIM][Tf <sub>2</sub> N]                     | 68                | 298.15          | 83   |
| [C <sub>6</sub> MMIM][Tf <sub>2</sub> N]                    | 131               | 298.15          | 83   |
| [N <sub>4444</sub> ][doc]                                   | 12100             | 298.15          | 83   |
| Ecoeng 500                                                  | 2790              | 298.15          | 83   |
| [C <sub>4</sub> MIM][LEV]                                   | 1441              | 303.15          | 84   |
| [C <sub>2</sub> py][EtSO <sub>4</sub> ]                     | 143.00            | 298.15          | 85   |
| [aP <sub>4443</sub> ][Ala]                                  | 758.00            | 298.15          | 85   |
| [aP <sub>4443</sub> ][Gly]                                  | 713.90            | 298.15          | 85   |
| [aP <sub>4443</sub> ][Ile]                                  | 1408.10           | 298.15          | 85   |
| [aP <sub>4443</sub> ][Leu]                                  | 1193.80           | 298.15          | 85   |
| [aP <sub>4443</sub> ][Lys]                                  | 1432.20           | 298.15          | 85   |
| [aP <sub>4443</sub> ][Met]                                  | 766.80            | 298.15          | 85   |
| [aP <sub>4443</sub> ][Phe]                                  | 1985.00           | 298.15          | 85   |
| [aP <sub>4443</sub> ][Pro]                                  | 1772.80           | 298.15          | 85   |
| [aP <sub>4443</sub> ][Ser]                                  | 1341.70           | 298.15          | 85   |
| [aP <sub>4443</sub> ][Thr]                                  | 1790.50           | 298.15          | 85   |
| [aP <sub>4443</sub> ][Val]                                  | 888.20            | 298.15          | 85   |
| [C <sub>2</sub> MIM][EtSO <sub>4</sub> ]                    | 101.42            | 298.15          | 86   |
| [C <sub>4</sub> MIM][EtSO <sub>4</sub> ]                    | 255.20            | 298.15          | 86   |



|                            |        |        |    |
|----------------------------|--------|--------|----|
| [C <sub>2</sub> MIM][DCA]  | 14.90  | 298.15 | 86 |
| [C <sub>2</sub> MIM][FAP]  | 60.53  | 298.15 | 87 |
| [C <sub>4</sub> MIM][BETI] | 115.90 | 298.15 | 87 |
| [C <sub>4</sub> MIM][FSI]  | 32.93  | 298.15 | 87 |
| [C <sub>6</sub> MIM][TFSI] | 70.51  | 298.15 | 87 |

## References

59. E. Ali, M. K. Hadj-Kali, S. Mulyono, I. Alnashef, A. Fakeeha, F. Mjalli and A. Hayyan, *Chem. Eng. Res. Des.*, 2014, **92**, 1898–1906.
60. L. F. Zubeir, M. H. M. Lacroix and M. C. Kroon, *J. Phys. Chem. B*, 2014, **118**, 14429–14441.
61. M. Francisco, A. van den Bruinhorst, L. F. Zubeir, C. J. Peters and M. C. Kroon, *Fluid Phase Equilib.*, 2013, **340**, 77–84.
62. Y. Hsu, R. B. Leron and M. Li, *J. Chem. Thermodyn.*, 2014, **72**, 94–99.
63. F. S. Mjalli and J. Naser, *Asia-Pac. J. Chem. Eng.*, 2015, **10**, 273–281.
64. W. Guo, Y. Hou, S. Ren, S. Tian and W. Wu, *J. Chem. Eng. Data*, 2013, **58**, 866–872.
65. A. Yadav and S. Pandey, *J. Chem. Eng. Data*, 2014, **59**, 2221–2229.
66. C. Florindo, F. S. Oliveira, L. P. N. Rebelo, A. M. Fernandes and I. M. Marrucho, *ACS Sustainable Chem. Eng.*, 2014, **2**, 2416–2425.
67. C. D’Agostino, R. C. Harris, A. P. Abbott, L. F. Gladden and M. D. Mantle, *Phys. Chem. Chem. Phys.*, 2011, **13**, 21383–21391.
68. A. Yadav, S. Trivedi, R. Rai and S. Pandey, *Fluid Phase Equilib.*, 2014, **367**, 135–142.
69. K. R. Siongco, R. B. Leron and M. Li, *J. Chem. Thermodyn.*, 2013, **65**, 65–72.
70. F. S. Mjalli, J. Naser, B. Jibril, V. Alizadeh and Z. Gano, *J. Chem. Eng. Data*, 2014, **59**, 2242–2251.
71. M. A. Kareem, F. S. Mjalli, M. A. Hashim and I. M. AlNashef, *J. Chem. Eng. Data*, 2010, **55**, 4632–4637.
72. A. Hayyan, F. S. Mjalli, I. M. AlNashef, Y. M. Al-Wahaibi, T. Al-Wahaibi and M. A. Hashim, *J. Mol. Liq.*, 2013, **178**, 137–141.
73. M. B. Shiflett and A. Yokozeki, *Ind. Eng. Chem. Res.*, 2005, **44**, 4453–4464.
74. P. Sharma, S. Choi, S. Park, I. Baek and G. Lee, *Chem. Eng. J.*, 2012, **181–182**, 834–841.
75. G. Wang, W. Hou, F. Xiao, J. Geng, Y. Wu and Z. Zhang, *J. Chem. Eng. Data*, 2011, **56**, 1125–1133.
76. C. Schreiner, S. Zugmann, R. Hartl and H. J. Gores, *J. Chem. Eng. Data*, 2010, **55**, 1784–1788.
- 77 J. S. Torrecilla, C. Tortuero, J. C. Cancilla and P. Díaz-Rodríguez, *Talanta*, 2013, **113**, 93–98.
78. C. A. N. de Castro, *J. Mol. Liq.*, 2010, **156**, 10–17.
79. S. Lall-Ramnarine, S. Suarez, N. Zmich, D. Ewko, S. Ramati, D. Cuffari, M. Sahin, Y. Adam, E. Rosario, D. Paterno and J. Wishart, *ECS Trans.*, 2014, **64**, 57–69.
80. G. Garcia, S. Aparicio and M. Atilhan, *J. Solution Chem.*, 2015, **44**, 890–899.
81. J. S. Torrecilla, J. Palomar, J. Lemus and F. Rodriguez, *Green Chem.*, 2010, **12**, 123–134.
82. R. Alcalde, G. Garcia, M. Atilhan and S. Aparicio, *Ind. Eng. Chem. Res.*, 2015, **54**, 10918–10924.
83. J. M. Crosthwaite, M. J. Muldoon, J. K. Dixon, J. L. Anderson and J. F. Brennecke, *J. Chem. Thermodyn.*, 2005, **37**, 559–568.

84. S. Stevanovic, A. Podgorsek, L. Moura, C. C. Santini, A. A. H. Padua and M. F. Costa Gomes, *Int. J. Greenhouse Gas Control*, 2013, **17**, 78–88.
85. Y. Zhang, S. Zhang, X. Lu, Q. Zhou, W. Fan and X. Zhang, *Chem. – Eur. J.*, 2009, **15**, 3003–3011.
86. E. Quijada-Maldonado, S. van der Boogaart, J. H. Lijbers, G. W. Meindersma and A. B. de Haan, *J. Chem. Thermodyn.*, 2012, **51**, 51–58.
87. A. Nazet, S. Sokolov, T. Sonnleitner, T. Makino, M. Kanakubo and R. Buchner, *J. Chem. Eng. Data*, 2015, **60**, 2400–2411.
